# Supplementary material for: The Use of Molecular Dynamics Simulation Method to Quantitatively Evaluate the Affinity between HBV Antigen T Cell Epitope Peptides and HLA-A Molecules
Source: MDPI journal article supplement (doi:10.3390/ijms23094629), 2022-04-22
Supplement: s1 [file s1]

**Table S1. Test parameters of the modelled structures**

| Modelled structure | Test parameters              |               |                      |
|--------------------|------------------------------|---------------|----------------------|
|                    | Alpha Chain                  | Beta Chain    | Heterodimer          |
| HLA-A*11:02        | Template:5WJL                | Template:5WJL | Ligand RMSD:0.977    |
|                    | Template Resolution:3.15 Å   |               | Clashscore:2.31      |
|                    | Template Allele: HLA-A*11:01 |               | Poor rotamers:3.37%  |
|                    | Identity:0.99                |               | Ramachandran         |
|                    | Verify Score:0.9891          |               | avored:97.30%        |
|                    | Verify Score:87.0079         |               | Molprobit score:1.54 |
|                    | Core:0.92                    |               | Total RMSD:0.005     |
|                    | Allow:0.076                  |               |                      |
|                    | Gener:0                      |               |                      |
|                    | Disall:0.004                 |               |                      |
| HLA-A*26:01        | Template:6AT9                | Template:6AT9 | Ligand RMSD:0.796    |
|                    | Template Resolution:2.95 Å   |               | Clashscore:4.86      |
|                    | Template Allele: HLA-A*01:01 |               | Poor rotamers:1.22%  |
|                    | Identity:0.91                |               | Ramachandran         |
|                    | Verify Score:0.9891          |               | avored:96.76%        |
|                    | Verify Score:80.8765         |               | Molprobit score:1.52 |
|                    | Core:0.88                    |               | Total RMSD:0.113     |
|                    | Allow:0.116                  |               |                      |
|                    | Gener:0.004                  |               |                      |
|                    | Disall:0                     |               |                      |
| HLA-A*33:03        | Template:5WJL                | Template:5WJL | Ligand RMSD:0.981    |
|                    | Template Resolution:3.15 Å   |               | Clashscore:2.55      |
|                    | Template Allele: HLA-A*11:01 |               | Poor rotamers:3.67%  |
|                    | Identity:0.93                |               | Ramachandran         |
|                    | Verify Score:0.9635          |               | avored:97.30%        |
|                    | Verify Score:92.8571         |               | Molprobit score:1.6  |
|                    | Core:0.917                   |               | Total RMSD:0.047     |
|                    | Allow:0.079                  |               |                      |
|                    | Gener:0                      |               |                      |
|                    | Disall:0.004                 |               |                      |
| HLA-A*31:01        | Template:5WJL                | Template:5WJL | Ligand RMSD:0.397    |
|                    | Template Resolution:3.15 Å   |               | Clashscore:2.78      |
|                    | Template Allele: HLA-A*11:01 |               | Poor rotamers:3.66%  |
|                    | Identity:0.93                |               | Ramachandran         |
|                    | Verify Score:0.9599          |               | avored:97.30%        |
|                    | Verify Score:92.4603         |               | Molprobit score:1.63 |
|                    | Core:0.917                   |               | Total RMSD:0.413     |
|                    | Allow:0.079                  |               |                      |
|                    | Gener:0                      |               |                      |
|                    | Disall:0.004                 |               |                      |
